# Supplementary material for: CSF enhancement on post-contrast fluid-attenuated inversion recovery images; a systematic review
Source: PubMed Central journal article supplement (PMC7559862; doi:10.1016/j.nicl.2020.102456), 2020-10-02
Supplement: mmc3.pdf [file mmc3.pdf]

**Supplemental table e-2: Population details and prevalence of cerebrospinal fluid enhancement.**

| Study                        | Design | Population details                                                                                                                                                               | Mean age(y %<br>%female | with<br>enhancement (n/N) | C: |
|------------------------------|--------|----------------------------------------------------------------------------------------------------------------------------------------------------------------------------------|-------------------------|---------------------------|----|
| <b>Stroke studies</b>        |        |                                                                                                                                                                                  |                         |                           |    |
| <b>Acute ischemic stroke</b> |        |                                                                                                                                                                                  |                         |                           |    |
| Choi et al., 2017            | CS/R   | Large artery atherosclerosis (n=75), small vessel occlusion (n=88), cardioembolism (n=31), strokes of other determined etiology (n=4), strokes with undetermined etiology (n=66) | 69, 41%                 | 25% (67/264)              |    |
| Dechambre et al., 2000       | CS/R   | Acute ischemic stroke with HARM (n=5)                                                                                                                                            | 76, 40%                 | 100% (5/5)***             |    |
| Eisele et al., 2015 ^        |        | Acute ischemic stroke with HARM (n=5)                                                                                                                                            | 64, 20%                 | 100% (5/5)***             |    |
| Forster et al., 2016         | CS/unk | Posterior circulation infarction including posterior cerebral artery (n=13) and basilar artery (n=3) occlusion                                                                   | 68.5**, 44%             | 50% (8/16)                |    |
| Gupta et al., 2017           | CS/R   | Mechanical thrombectomy of large vessel occlusion (n=35)                                                                                                                         | 64, 43%                 | 51% (18/35)               |    |

|                                                 |        |                                                                                                                                                              |           |                 |
|-------------------------------------------------|--------|--------------------------------------------------------------------------------------------------------------------------------------------------------------|-----------|-----------------|
| Henning et al., 2008 ±                          | CS/R   | Acute ischemic stroke (n=10) with HARM                                                                                                                       | 79, 50%   | 100% (10/10)*** |
| Hjort et al., 2008                              | CS/R   | Acute ischemic stroke with thrombolytic therapy (n=33)                                                                                                       | 68, unk   | 12% (4/33)      |
| Kim et al., 2005                                | CS/P   | Acute middle cerebral artery territory infarction with intra-arterial thrombolysis combined with IV tPA or intra-arterial urokinase treatment                | 62, 50%   | 57% (8/14)      |
| Latour et al., 2004 ±,<br>Warach et al., 2004 ± | CS/P   | Acute ischemic stroke (n=144)                                                                                                                                | 73, 48%   | 33% (47/144)    |
| Luby et al., 2019                               | CS/unk | Acute anterior circulation infarction with endovascular therapy with (n=45) or without (n=35) standard IV tPA                                                | 65**, 64% | 65% (52/80)     |
| Nadareishvili et al., 2018                      | CS/R   | Acute ischemic stroke without thrombolytic therapy or hemorrhagic transformation (n=33)                                                                      | 73, 61%   | 27% (9/33)      |
| Ostwaldt et al., 2014 #                         | CS/unk | Acute ischemic stroke (n=18)                                                                                                                                 | 69**, 28% | 44% (8/18)      |
| Ostwaldt et al., 2015 #                         | CS/P   | Large artery atherosclerosis (n=145), cardioembolism (n=125), small-vessel occlusion (n=68), other determined etiology (n=11), undetermined etiology (n=180) | 71**, 39% | 18% (97/529)    |
| Villringer et al., 2017 #                       | CS/P   | Acute ischemic stroke (n=30)                                                                                                                                 | unk       | 23% (7/30)      |

**Acute ischemic stroke or transient ischemic attack (mixed)**

|                         |        |                                                                                 |           |               |
|-------------------------|--------|---------------------------------------------------------------------------------|-----------|---------------|
| Lee et al., 2015 *      | CS/R   | Acute ischemic stroke with (n=501) and without (n=77) diffusion abnormalities   | 59, 39%   | 12% (70/578)  |
| Lee et al., 2016 *      | CS/P   | Acute ischemic stroke or TIA (n=218)                                            | 71, 33%   | 5.5% (12/218) |
| Lee et al., 2018        | CS/R   | Acute ischemic stroke or TIA with acute or subacute endovascular therapy (n=45) | unk       | 4.4% (2/45)   |
| Rozanski et al., 2010 # | CS/unk | Old ( $\geq 80$ y) cases with acute ischemic stroke or TIA (n=47)               | 84**, 51% | 40% (19/47)   |

**Spontaneous intracerebral hemorrhage**

|                      |      |                                                          |         |             |
|----------------------|------|----------------------------------------------------------|---------|-------------|
| Jolink et al., 2019  | CS/P | Spontaneous ICH (n=31)                                   | 60, 29% | 55% (17/31) |
| Kidwell et al., 2011 | CS/R | Spontaneous ICH with available pcT2wFLAIR imaging (n=46) | 65, 60% | 85% (39/46) |

**Acute ischemic stroke, spontaneous intracerebral hemorrhage or transient ischemic attack (mixed cases)**

|                   |      |                                                                                                   |         |             |
|-------------------|------|---------------------------------------------------------------------------------------------------|---------|-------------|
| Barr et al., 2010 | CS/P | Acute ischemic cerebrovascular syndrome (n=33), ICH (n=6), stroke mimic (n=1),<br>no stroke (n=1) | 62, 44% | 41% (17/41) |
|-------------------|------|---------------------------------------------------------------------------------------------------|---------|-------------|

---

**Post-cardiovascular and intracranial vascular surgery studies**

---

---

**Treatment for carotid artery disease**

|                        |        |                                                                     |         |                                    |
|------------------------|--------|---------------------------------------------------------------------|---------|------------------------------------|
| Cho et al., 2014       | CS/P   | Carotid stenting (n=16) or endarterectomy (n=29)                    | 68, 22% | 18% (8/45)                         |
| Ogami et al., 2011     | CS/P   | Carotid artery stenting (symptomatic (n=11) and asymptomatic (n=10) | 74, 29% | 52% (11/21 procedures in 19 cases) |
| Wilkinson et al., 2000 | CS/unk | Symptomatic carotid artery stenting (n=12)                          | 68, 50% | 100% (12/12)                       |

**Aneurysm treatment**

|                            |      |                                                                |         |                                      |
|----------------------------|------|----------------------------------------------------------------|---------|--------------------------------------|
| Li et al., 2018            | CS/P | Flow diversion therapy for unruptured intracranial aneurysm(s) | 59, 88% | 83% (34/41)                          |
| Suthiphosuwan et al., 2018 | CS/R | Endovascular coiling of unruptured intracranial aneurysms      | 57, 69% | 52% (32/62 examinations in 58 cases) |

**Cardiac surgery**

|                     |      |                                                                                                                            |         |            |
|---------------------|------|----------------------------------------------------------------------------------------------------------------------------|---------|------------|
| Merino et al., 2013 | CS/P | Cardiac surgery (off-pump coronary artery bypass grafting (CABG) (n=6), on-pump CABG (n=7), on-pump valvular surgery (n=6) | 67, unk | 47% (9/19) |
|---------------------|------|----------------------------------------------------------------------------------------------------------------------------|---------|------------|

---

**MS studies**

---

---

|                          |                     |                                                                                                                                     |           |              |
|--------------------------|---------------------|-------------------------------------------------------------------------------------------------------------------------------------|-----------|--------------|
| Absinta et al., 2015     | CS/P,<br>subset L/P | Clinically isolated syndrome (n=10), relapsing remitting MS (n=171), secondary progressive MS (n=44), primary progressive MS (n=74) | 48**, 59% | 25% (74/299) |
| Bergsland et al., 2019 s | CS/R/P              | Relapsing remitting MS or secondary progressive MS (n=342)                                                                          | unk       | 17% (58/342) |
| Coulette et al., 2019 ^^ | CS/L/R              | Acute optic neuritis with MS (n=56) or clinically isolated syndrome (n=17)                                                          | 38, 68%   | 8% (6/73)    |
| Eisele et al., 2015      | CS/R                | Clinically isolated syndrome (n=18), relapsing remitting MS (n=79), secondary progressive MS (n=9), primary progressive MS (n=6)    | 38, 70%   | 1% (1/112)   |
| Harrison et al., 2017 &  | CS/P                | Relapsing remitting MS (n=21), secondary progressive MS (n=4), primary progressive MS (n=4)                                         | 45.1, 52% | 90% (26/29)  |

|                          |        |                                                                                                          |           |              |
|--------------------------|--------|----------------------------------------------------------------------------------------------------------|-----------|--------------|
| Ighani et al., 2020 &    | CS/unk | Relapsing remitting MS (n=31), secondary progressive MS (n=5), primary progressive mS (n=5)              | 46, 66%   | 80% (33/41)  |
| Jonas et al., 2018 &     | L/P    | Relapsing remitting MS (n=21), secondary progressive MS (n=7), progressive MS (n=4)                      | 49**, 65% | 100% (31/31) |
| Zivadinov et al., 2017 § | CS/R   | Relapsing remitting MS (n=27), secondary progressive MS (n=23)                                           | 47, 80%   | 50% (25/50)  |
| Zivadinov et al., 2018 § | CS/R   | Relapsing remitting MS (n=212), secondary progressive MS (n=32), and clinically isolated syndrome (n=14) | 49, 76%   | 15% (39/258) |
| Zurawski et al., 2020    | CS/unk | Relapsing remitting MS (n=30)                                                                            | 44, 67%   | 66% (20/30)  |

---

#### Studies in meningitis

---

|                         |        |                                                                                   |         |              |
|-------------------------|--------|-----------------------------------------------------------------------------------|---------|--------------|
| Ahmad et al., 2005      | CS/P   | Tuberculous meningitis (n=15), pyogenic meningitis (n=6), viral meningitis (n=10) | 48, 45% | 90% (28/31)  |
| Alonso et al., 2015     | CS/R   | Acute aseptic meningitis                                                          | 35, 43% | 50% (7/14)   |
| Fukuoka et al., 2010    | CS/P   | Infectious meningitis (n=5), meningoencephalitis (n=3)                            | 62, 25% | 75% (6/8)    |
| Splendiani et al., 2005 | CS/unk | Infectious meningitis (n=12)                                                      | 46, 67% | 100% (12/12) |

---

---

**Studies in other diseases**

---

**Memory clinic patients**

Freeze et al., 2017 @ CS/P, Mild cognitive impairment (n=33), Alzheimer's disease (n=15) 70, 30% 33% (16/48)

subset L/P

Freeze et al., 2019 @ L/P Mild cognitive impairment (n=2) with CSF enhancement 81, 0% 100% (2/2)\*\*\*

**Susac syndrome**

Coulette et al., 2019 CS/L/R Cases with a definite (n=8) or probable (n=1) diagnosis of Susac syndrome 38, 89% 56% (5/9)

**Familial amyloid polyneuropathy**

Hirai et al., 2005 CS/P Tyr114Cys mutation (n=3), Val30Met mutation (n=3) 40, 67% 50% (3/6)

**Inflammatory and immune-mediated neurologic diseases**

Absinta et al., 2017 CS/P Neuromyelitis optica spectrum disorder, immune-mediated encephalitis, immune- 43, 61% 35% (18/51)

mediated cerebellar ataxia, systemic inflammatory diseases with white matter MRI

abnormalities not suggestive for MS, and Susac syndrome (n=51)

**Noninflammatory neurologic diseases**

|                      |      |                                                                                               |         |           |
|----------------------|------|-----------------------------------------------------------------------------------------------|---------|-----------|
| Absinta et al., 2017 | CS/P | Small vessel disease, migraine, neurodegenerative diseases, and compressive myelopathy (n=38) | 50, 71% | 8% (3/38) |
|----------------------|------|-----------------------------------------------------------------------------------------------|---------|-----------|

**Human T-lymphotropic virus (HTLV) infection**

|                      |      |                                                                                                    |         |             |
|----------------------|------|----------------------------------------------------------------------------------------------------|---------|-------------|
| Absinta et al., 2017 | CS/P | HTLV-associated myelopathy/tropical spastic paraparesis (n=25), asymptomatic HTLV infection (n=13) | 53, 66% | 45% (17/38) |
|----------------------|------|----------------------------------------------------------------------------------------------------|---------|-------------|

**Human immunodeficiency virus (HIV) infection**

|                      |      |                                                    |         |             |
|----------------------|------|----------------------------------------------------|---------|-------------|
| Absinta et al., 2017 | CS/P | Cases with HIV infection on antiretroviral therapy | 52, 41% | 21% (13/61) |
|----------------------|------|----------------------------------------------------|---------|-------------|

Abbreviations: N, sample size; n, number of cases with pcT2wFLAIR CSF enhancement; AIS, acute ischemic stroke; TIA, transient ischemic attack; ICH, intracerebral hemorrhage; CS, cross-sectional; L, longitudinal; R, retrospective; P, prospective; CSF, cerebrospinal fluid; unk, unknown; MS, multiple sclerosis.

#\*±&\$@ Studies with (suspected) overlapping study samples.

\*\* Mean not available, median reported instead.

\*\*\* Because these studies only selected cases based on CSF enhancement positivity, these cases are excluded from the pooled prevalence estimates as depicted in figure 3.

^ Stroke cases were included as positive control in this study, with the main focus on MS.

^^ MS cases were included as controls in this study, with the main focus on Susac syndrome.
