# Supplementary material for: CSF enhancement on post-contrast fluid-attenuated inversion recovery images; a systematic review
Source: PubMed Central journal article supplement (PMC7559862; doi:10.1016/j.nicl.2020.102456), 2020-10-02
Supplement: mmc4.pdf [file mmc4.pdf]

**Supplemental table e-3: Population details and prevalence of cerebrospinal fluid enhancement in control cases**

| Study                                  | Design              | Population details                                                                                                                                                 | Age(y),<br>%female | % with CSF<br>enhancement (n/N) |
|----------------------------------------|---------------------|--------------------------------------------------------------------------------------------------------------------------------------------------------------------|--------------------|---------------------------------|
| Absinta et al.,<br>2015 % <sup>1</sup> | CS/P                | 9 healthy volunteers, 19 healthy first-degree relatives of MS cases, 9 healthy individual<br>asymptomatically infected with human T-cell lymphotropic virus type I | 42**, 48%          | 3% (1/37)                       |
| Absinta et al.,<br>2017 % <sup>2</sup> | CS/P                | 66 healthy volunteers                                                                                                                                              | 42, 48%            | 8% (5/66)                       |
| Freeze et al.,<br>2017 @ <sup>3</sup>  | CS/P,<br>subset L/P | 26 older healthy volunteers                                                                                                                                        | 73, 46%            | 19% (5/26)                      |
| Freeze et al.,<br>2019 @ <sup>4</sup>  | L/P                 | 4 older healthy volunteers with baseline CSF enhancement                                                                                                           | 74, 50%            | 100% (4/4)                      |
| Ighani et al.,<br>2020 & <sup>5</sup>  | CS/unk              | 5 healthy volunteers                                                                                                                                               | 44, 20%            | 60% (3/5)                       |

|                            |        |                      |         |           |
|----------------------------|--------|----------------------|---------|-----------|
| Harrison et al.,<br>2017 & | CS/P   | 3 healthy volunteers | 37, 33% | 67% (2/3) |
| Zurawski et al.,<br>2020   | CS/unk | 15 healthy controls  | 44, 67% | 7% (1/15) |

---

Abbreviations: N, sample size; n, number of cases with pcT2wFLAIR CSF enhancement; CS, cross-sectional; P, prospective; CSF, cerebrospinal fluid; unk, unknown.

@& Studies with (suspected) overlapping study samples.

\*\* Mean not available, median reported instead.
