# Supplementary material for: CSF enhancement on post-contrast fluid-attenuated inversion recovery images; a systematic review
Source: PubMed Central journal article supplement (PMC7559862; doi:10.1016/j.nicl.2020.102456), 2020-10-02
Supplement: mmc6.pdf [file mmc6.pdf]

**Supplemental table e-5: Post-contrast FLAIR acquisition details.**

| Study                        | Pre-contrast FLAIR | Field strength | Contrast type | dose       | Time from CA acquisition to TR | TR        | TI        | TE     | Slice thickness, 2D/3D |
|------------------------------|--------------------|----------------|---------------|------------|--------------------------------|-----------|-----------|--------|------------------------|
| <b>Stroke studies</b>        |                    |                |               |            |                                |           |           |        |                        |
| <b>Acute ischemic stroke</b> |                    |                |               |            |                                |           |           |        |                        |
| Choi et al., 2017            | Yes                | 3T             | -             | 0.2mmol/kg | 5min                           | 11000     | -         | 125    | 5mm, 2D                |
| Dechambre et al., 2000       | Yes                | 1.5T           | Gd-DTPA       | 0.1mmol/kg | 18-42h, 3d, 6d                 | 10002     | 2200      | 148    | 5mm, 2D                |
| Forster et al., 2016         | Yes                | 1.5T           | Gd-DOTA       | 0.1mmol/kg | Within 24h                     | 8500/9000 | 2400/2500 | 115/89 | 5mm, 2D                |
| Gupta et al., 2017           | No                 | 1.5T           | -             | 0.1mmol/kg | 24h                            | 11000     | -         | 140    | 5mm, 2D                |
| Henning et al., 2008 ±       | Yes                | 1.5T           | -             | -          | -                              | 9000      | 1750      | 85     | 7mm, 2D                |
| Hjort et al., 2008           | Yes                | 1.5T or 3T     | Gd-BT-Do3A    | -          | 2h and 24h                     | 8650      | -         | 120    | -                      |

|                                                |                         |      |            |                                          |                                                         |       |      |     |         |
|------------------------------------------------|-------------------------|------|------------|------------------------------------------|---------------------------------------------------------|-------|------|-----|---------|
| Kim et al., 2005                               | -                       | 1.5T | Gd-DTPA    | 20ml, unclear if there were multiple CAs | ~2h, 3d                                                 | 10000 | 2200 | 133 | 5mm, 2D |
| Latour et al., 2004 ±<br>Warach et al., 2004 ± | Yes, in all but 5 cases | 1.5T | Gd-DTPA    | 0.1mmol/kg                               | 10 min + variable depending on clinical needs, up to 5d | -     | -    | -   | -       |
| Luby et al., 2019                              | -                       | 3T   | Gd-DTPA    | 0.1mmol/kg, variable number of doses     | -                                                       | -     | -    | -   | -       |
| Nadareishvili et al., 2018                     | Yes                     | 1.5T | Gd-DTPA    | 0.1mmol/kg                               | 24h                                                     | -     | -    | -   | -       |
| Ostwaldt et al., 2014 #                        | Yes                     | 3T   | Gd-BT-Do3A | 5ml, multiple CAs                        | 1.5-5h + multiple examinations                          | 8000  | -    | 100 | 5mm, 2D |
| Ostwaldt et al., 2015 #                        | Yes                     | 3T   | Gd-BT-Do3A | Between 0.04 and 0.31mmol/kg             | ~24h + variable depending on clinical needs             | 8000  | -    | 100 | 5mm, 2D |

|                         |   |    |            |      |   |   |   |   |   |
|-------------------------|---|----|------------|------|---|---|---|---|---|
| Villringer et al., 2017 | - | 3T | Gd-BT-Do3A | 10ml | - | - | - | - | - |
|-------------------------|---|----|------------|------|---|---|---|---|---|

#

**Acute ischemic stroke or transient ischemic attack (mixed cases)**

|                    |    |            |            |                                  |                                   |       |   |         |         |
|--------------------|----|------------|------------|----------------------------------|-----------------------------------|-------|---|---------|---------|
| Lee et al., 2015 * | No | 1.5T or 3T | Gd-BT-Do3A | 0.2mmol/kg or fixed dose of 15ml | or ~5 min + multiple examinations | 11000 | - | 120-140 | 5mm, 2D |
|--------------------|----|------------|------------|----------------------------------|-----------------------------------|-------|---|---------|---------|

|                    |    |            |            |      |                       |       |      |         |         |
|--------------------|----|------------|------------|------|-----------------------|-------|------|---------|---------|
| Lee et al., 2016 * | No | 1.5T or 3T | Gd-BT-Do3A | 15ml | ~5min +2.5-19h + 3-5d | 11000 | 2500 | 120-140 | 5mm, 2D |
|--------------------|----|------------|------------|------|-----------------------|-------|------|---------|---------|

|                  |   |   |   |   |   |   |   |   |   |
|------------------|---|---|---|---|---|---|---|---|---|
| Lee et al., 2018 | - | - | - | - | - | - | - | - | - |
|------------------|---|---|---|---|---|---|---|---|---|

|                       |     |    |            |       |      |      |   |     |         |
|-----------------------|-----|----|------------|-------|------|------|---|-----|---------|
| Rozanski et al., 2010 | Yes | 3T | Gd-BT-Do3A | 4-6ml | ~24h | 8000 | - | 100 | 5mm, 2D |
|-----------------------|-----|----|------------|-------|------|------|---|-----|---------|

#

|                     |     |    |                       |                               |        |      |      |     |          |
|---------------------|-----|----|-----------------------|-------------------------------|--------|------|------|-----|----------|
| Jolink et al., 2019 | Yes | 7T | Gd-BT-Do3A or Gd-DOTA | 0.1mmol/kg (max 10ml or 30ml) | >10min | 8000 | 2325 | 300 | <1mm, 3D |
|---------------------|-----|----|-----------------------|-------------------------------|--------|------|------|-----|----------|

**Spontaneous intracerebral hemorrhage**

|                      |                   |            |   |                      |   |   |   |   |   |
|----------------------|-------------------|------------|---|----------------------|---|---|---|---|---|
| Kidwell et al., 2011 | Yes, at least 78% | 1.5T or 3T | - | Variable doses (1-4) | - | - | - | - | - |
|----------------------|-------------------|------------|---|----------------------|---|---|---|---|---|

**Acute ischemic stroke, spontaneous intracerebral hemorrhage or transient ischemic attack (mixed cases)**

|                   |     |    |         |            |      |   |   |   |   |
|-------------------|-----|----|---------|------------|------|---|---|---|---|
| Barr et al., 2010 | Yes | 3T | Gd-DTPA | 0.1mmol/kg | ~24h | - | - | - | - |
|-------------------|-----|----|---------|------------|------|---|---|---|---|

---

**Post-cardiovascular and intracranial vascular surgery studies**

---

**Carotid artery disease treatment**

|                        |     |      |         |         |                                       |       |      |      |         |
|------------------------|-----|------|---------|---------|---------------------------------------|-------|------|------|---------|
| Cho et al., 2014       | Yes | 1.5T | -       | -       | ~24h                                  | 10002 | 2200 | 97.5 | -, 2D   |
| Ogami et al., 2011     | Yes | 1.5T | Gd-DTPA | 15ml    | On average >19h                       | 8000  | 2000 | 114  | 6mm, 2D |
| Wilkinson et al., 2000 | Yes | 1.5T | Gd-DTPA | 2x 20ml | Short (within the same session as CA) | 6000  | 1800 | 95.9 | 5mm, 2D |

**Aneurysm treatment**

|                 |                |               |          |            |   |      |      |     |           |
|-----------------|----------------|---------------|----------|------------|---|------|------|-----|-----------|
| Li et al., 2018 | Yes, 81% cases | in 1.5T or 3T | Gd-BOPTA | 0.1mmol/kg | - | 6000 | 1700 | 135 | 1.6mm, 3D |
|-----------------|----------------|---------------|----------|------------|---|------|------|-----|-----------|

|                            |    |      |          |      |                                     |       |      |     |         |
|----------------------------|----|------|----------|------|-------------------------------------|-------|------|-----|---------|
| Suthiphosuwan et al., 2018 | No | 1.5T | Gd-BOPTA | 20ml | Short (after contrast-enhanced MRA) | 11000 | 2800 | 140 | 5mm, 2D |
|----------------------------|----|------|----------|------|-------------------------------------|-------|------|-----|---------|

**Cardiac surgery**

|                     |                 |               |   |            |                                               |      |           |         |             |
|---------------------|-----------------|---------------|---|------------|-----------------------------------------------|------|-----------|---------|-------------|
| Merino et al., 2013 | Yes, ~50% cases | in 1.5T or 3T | - | 0.1mmol/kg | <1h in ~ 50% of patients, 30.4h in other half | 9000 | 2200/2600 | 140-120 | 3.5-4mm, 2D |
|---------------------|-----------------|---------------|---|------------|-----------------------------------------------|------|-----------|---------|-------------|

---

**MS studies**

|                      |                |       |                                   |            |                                             |           |           |         |         |
|----------------------|----------------|-------|-----------------------------------|------------|---------------------------------------------|-----------|-----------|---------|---------|
| Absinta et al., 2015 | Yes, 46% cases | in 3T | Gd-DTPA (15%) or Gd-BT-Do3A (85%) | 0.1mmol/kg | ≥10min; median (IQR) MS cases = 26 (11) min | 4800/6000 | 1800/1860 | 125/354 | 1mm, 3D |
|----------------------|----------------|-------|-----------------------------------|------------|---------------------------------------------|-----------|-----------|---------|---------|

|                         |     |    |             |            |        |      |      |     |                                      |
|-------------------------|-----|----|-------------|------------|--------|------|------|-----|--------------------------------------|
| Bergsland et al., 2019  | Yes | 3T | Gd-DTPA     | 0.1mmol/kg | 10min  | 9000 | 2420 | 600 | 1mm, 3D<br>(TE <sub>eff</sub> = 110) |
| Coulette et al., 2019   | No  | 3T | -           | 0.1mm/kg   | 12min  | 8000 | 2400 | 388 | 1mm, 3D                              |
| Eisele et al., 2015     | Yes | 3T | Gd-DOTA     | 0.1mmol/kg | >10min | 8500 | 2500 | 136 | 5mm, 2D                              |
| Harrison et al., 2017 & | Yes | 7T | Gd-HP-Do3A  | 0.1mmol/kg | 20min  | 8000 | 2077 | 400 | 0.7mm, 3D                            |
| Ighani et al., 2020 &   | Yes | 7T | Gd-HP-Do3A  | 0.1mmol/kg | 20min  | 8000 | 2077 | 400 | 0.7mm, 3D                            |
| Jonas et al., 2018 &    | Yes | 7T | Gd-HP-Do3A  | 0.1mmol/kg | 20min  | 8000 | 2077 | 400 | 0.7mm, 3D                            |
| Zivadinov et al., 2017  | Yes | 3T | Gd- BT-DO3A | 0.1mmol/kg | 10min  | -    | -    | -   | 1mm, 3D; -,<br>2D                    |
| Zivadinov et al., 2018  | Yes | 3T | Gd-DTPA     | 0.1mmol/kg | 10min  | 9000 | 2420 | 600 | 1mm, 3D<br>(TE <sub>eff</sub> = 110) |
| Zurawski et al., 2020   | Yes | 7T | Gd-DOTA     | 0.1mmol/kg | 10min  | 9000 | 2500 | 301 | 0.7mm, 3D                            |

---

---

**Studies in meningitis**

---

|                            |     |      |                 |            |                                      |       |      |               |           |
|----------------------------|-----|------|-----------------|------------|--------------------------------------|-------|------|---------------|-----------|
| Ahmad et al., 2005         | Yes | 1.5T | Gd-DTPA-<br>BMA | 0.1mm/kg   | 3-4min                               | 9000  | 2500 | TEeff =<br>88 | 5mm, 2D   |
| Alonso et al., 2015        | Yes | 3T   | -               | -          | -                                    | -     | -    | -             | -         |
| Fukuoka et al., 2010       | Yes | 3T   | Gd-DTPA         | 0.1mmol/kg | Short (1 or 2 sequences<br>after CA) | 6000  | 2000 | 420           | 0.9mm, 3D |
| Splendiani et al.,<br>2005 | Yes | 1.5T | -               | 0.1mmol/kg | 0-2min                               | 10000 | 2200 | 147           | 5mm, 2D   |

---

**Studies in other diseases**

---

**Memory clinic patients**

|                       |     |    |            |                         |                 |      |      |                |         |
|-----------------------|-----|----|------------|-------------------------|-----------------|------|------|----------------|---------|
| Freeze et al., 2017 @ | Yes | 3T | Gd-BT-DO3A | 0.1mmol/kg, max<br>10ml | 16min           | 4800 | 1650 | 290            | 1mm, 3D |
| Freeze et al., 2019 @ | Yes | 3T | Gd-BT-DO3A | 0.1mmol/kg              | 16min and >1.5h | 4800 | 1650 | 290 and<br>500 | 1mm, 3D |

**Mixed (non-MS) infectious and non-infectious diseases**

|                      |       |    |    |   |            |        |   |   |   |   |
|----------------------|-------|----|----|---|------------|--------|---|---|---|---|
| Absinta et al., 2017 | Yes,  | in | 3T | - | 0.1mmol/kg | ≥10min | - | - | - | - |
|                      | 81%   | of |    |   |            |        |   |   |   |   |
|                      | cases |    |    |   |            |        |   |   |   |   |

**Familial amyloid polyneuropathy**

|                    |     |  |      |         |            |                          |      |      |     |         |
|--------------------|-----|--|------|---------|------------|--------------------------|------|------|-----|---------|
| Hirai et al., 2005 | Yes |  | 1.5T | Gd-DTPA | 0.1mmol/kg | 0min and 3h, 6h, and 24h | 6000 | 2000 | 120 | 5mm, 2D |
|--------------------|-----|--|------|---------|------------|--------------------------|------|------|-----|---------|

---

Abbreviations: TR, repetition time; TI, inversion time; TE, echo time; -, unknown; ~, approximately; Gd-DTPA, gadopentetate (Magnevist ®); Gd-DOTA, gadoterate (Dotarem ®); Gd-BT-Do3A, gadobutrol (Gadavist ®); Gd-BOPTA, gadobenate (MultiHance ®); MRA, magnetic resonance angiography; IQR, interquartile range; MS, multiple sclerosis; Gd-HP-Do3A, gadoteridol (Prohance ®); Gd-DTPA-BMA, gadodiamide (Omniscan™); TE<sub>eff</sub>, effective echo time.

#\*±&\$@ Studies with (suspected) overlapping study samples.
