# Supplementary material for: CSF enhancement on post-contrast fluid-attenuated inversion recovery images; a systematic review
Source: PubMed Central journal article supplement (PMC7559862; doi:10.1016/j.nicl.2020.102456), 2020-10-02
Supplement: mmc7.pdf [file mmc7.pdf]

|                                                                         |         |    |    |    |    |    |   |   |   |   |
|-------------------------------------------------------------------------|---------|----|----|----|----|----|---|---|---|---|
| Hjort et al., 2008                                                      | -       | -  | -  | -  | -  | -  | - | - | - | - |
| Kim et al., 2005                                                        | -       | -  | -  | -  | -  | -  | - | - | - | - |
| Latour et al., 2004 ,<br>Warach et al., 2004                            | Yes (+) | No | No | -  | -  | -  | - | - | - | - |
| Luby et al., 2019                                                       | -       | -  | -  | -  | -  | -  | - | - | - | - |
| Nadareishvili et al.,<br>2018                                           | No      | No | No | No | -  | -  | - | - | - | - |
| Ostwaldt et al.,<br>2014 #                                              | No      | No | No | No | No | No | - | - | - | - |
| Ostwaldt et al.,<br>2015 #                                              | Yes (+) | -  | -  | -  | -  | -  | - | - | - | - |
| Villringer et al.,<br>2017 #                                            | -       | -  | -  | -  | -  | -  | - | - | - | - |
| <b>Acute ischemic stroke or transient ischemic attack (mixed cases)</b> |         |    |    |    |    |    |   |   |   |   |
| Lee et al., 2015 *                                                      | Yes (+) | No | No | No | No | No | - | - | - | - |

|                         |         |    |    |    |         |   |    |   |   |   |   |
|-------------------------|---------|----|----|----|---------|---|----|---|---|---|---|
| Lee et al., 2016 *      | -       | -  | -  | -  | -       | - | -  | - | - | - | - |
| Lee et al., 2018        | -       | -  | -  | -  | -       | - | -  | - | - | - | - |
| Rozanski et al., 2010 # | Yes (+) | No | No | No | Yes (-) | - | No | - | - | - | - |

**Spontaneous intracerebral hemorrhage**

|                      |    |    |    |    |   |    |    |   |         |   |   |
|----------------------|----|----|----|----|---|----|----|---|---------|---|---|
| Kidwell et al., 2011 | -  | -  | -  | -  | - | -  | -  | - | -       | - | - |
| Jolink et al., 2019  | No | No | No | No | - | No | No | - | Yes (+) | - | - |

**Acute ischemic stroke, spontaneous intracerebral hemorrhage or transient ischemic attack (mixed cases)**

|                   |         |    |    |   |   |   |   |   |   |   |   |
|-------------------|---------|----|----|---|---|---|---|---|---|---|---|
| Barr et al., 2010 | Yes (+) | No | No | - | - | - | - | - | - | - | - |
|-------------------|---------|----|----|---|---|---|---|---|---|---|---|

**Post-cardiovascular and intracranial vascular surgery studies**

**Carotid artery disease treatment**

|                    |         |    |    |    |    |    |    |   |   |   |   |
|--------------------|---------|----|----|----|----|----|----|---|---|---|---|
| Cho et al., 2014   | Yes (+) | No | No | No | No | No | No | - | - | - | - |
| Ogami et al., 2011 | Yes (+) | No | No | No | No | -  | -  | - | - | - | - |

Wilkinson et al., 2000 - - - - - - - - - -

**Aneurysm treatment**

Li et al., 2018 No - No No - No - - - -

Suthiposuwana et al., 2018 No No - - - - - - - -

**Cardiac surgery**

Merino et al., 2013 - - - - - - - - - -

---

**Studies in Multiple Sclerosis**

---

Absinta et al., 2015 Yes (+) No - - - - No - - Yes (+)

Bergsland et al., 2019s - - - - - - - - - Yes (+)

Coulette et al., 2019 - - - - - - - - - -

|                          |                                                |    |   |   |   |   |         |   |   |         |
|--------------------------|------------------------------------------------|----|---|---|---|---|---------|---|---|---------|
| Eisele et al., 2015      | -                                              | -  | - | - | - | - | -       | - | - | -       |
| Harrison et al., 2017 &  | -                                              | -  | - | - | - | - | -       | - | - | -       |
| Ighani et al., 2020 &    | -                                              | -  | - | - | - | - | No      | - | - | Yes (+) |
| Jonas et al., 2018 &     | -                                              | -  | - | - | - | - | -       | - | - | -       |
| Zivadinov et al., 2017 s | No                                             | No | - | - | - | - | -       | - | - | Yes (+) |
| Zivadinov et al., 2018 s | Yes (+),<br>in<br>relapsing<br>remitting<br>MS | No | - | - | - | - | -       | - | - | -       |
| Zurawski et al., 2020    | No                                             | No | - | - | - | - | Yes (+) | - | - | No      |

---

**Studies in meningitis**

---



## Familial amyloid polyneuropathy

Hirai et al., 2005   -   -   -   -   -   -   -   -   -   -

---

Abbreviations: HyT, hypertension; DM, diabetes Mellitus; H, hyperlipidemia; Sm, smoking; WMH, white matter hyperintensities; LI, lacunar infarcts; CMB, cerebral microbleeds; -, negative association; +, positive association.

#\*±&\$@% Studies with (suspected) overlapping study samples.
